# Supplementary material for: Caffeine Restores Neuronal Damage and Inflammatory Response in a Model of Intraventricular Hemorrhage of the Preterm Newborn
Source: Frontiers journal article supplement (doi:10.3389/fcell.2022.908045), 2022-08-12
Supplement: Data_Sheet_1.pdf [file Data_Sheet_1.pdf]

**Supplementary Table 1.** Statistical data after analyzing the role of Caf in GM-IVH in the short (P14) and the long (P70) term.

| Study                                                           | Short term (p14)                                                                                    | Long term (P70)                                                                                                                                                                                                                                                                                  |
|-----------------------------------------------------------------|-----------------------------------------------------------------------------------------------------|--------------------------------------------------------------------------------------------------------------------------------------------------------------------------------------------------------------------------------------------------------------------------------------------------|
| Distance travelled in the open field                            |                                                                                                     | [F <sub>(2,70)</sub> =1.59, p=0.211]                                                                                                                                                                                                                                                             |
| Time in rotarod                                                 |                                                                                                     | [F <sub>(2,73)</sub> =1.60, p=0.209]                                                                                                                                                                                                                                                             |
| Maximum speed in rotarod                                        |                                                                                                     | [F <sub>(5,72)</sub> =0.906, p=0.482]                                                                                                                                                                                                                                                            |
| Swimming velocity in the MWM                                    |                                                                                                     | [F <sub>(2,73)</sub> =2.70, p=0.074]                                                                                                                                                                                                                                                             |
| What paradigm in the NOD test                                   |                                                                                                     | [F <sub>(5,200)</sub> =2.32, p=0.038; †p=0.014 vs. Control+Caf10, Control+Caf20 and Col+Caf10]                                                                                                                                                                                                   |
| Where paradigm in the NOD test                                  |                                                                                                     | [F <sub>(5,213)</sub> =1.28, p=0.278]                                                                                                                                                                                                                                                            |
| When paradigm in the NOD test                                   |                                                                                                     | [F <sub>(2,209)</sub> =3.97, p=0.002; ‡‡p<0.001 vs. Control, Control+Caf10, Col+Caf10 and Col+Caf20]                                                                                                                                                                                             |
| Time along acquisition phase of the MWM                         |                                                                                                     | day 1 [F <sub>(5,305)</sub> =1.72, p=0.128]<br>day 2 [F <sub>(5,307)</sub> =0.315, **p=0.009 vs. rest of the groups<br>day 3 [F <sub>(5,310)</sub> =2.52, ††p=0.029 vs. Control, Control+Caf10 and Control+Caf20]<br>day 4 [F <sub>(5,270)</sub> =5.050, ‡‡p<0.01 vs. Control and Control+Caf10] |
| Number of entrances in quadrant 2 in the retention 1 of the MWM |                                                                                                     | [F <sub>(2,67)</sub> =5.88, p=0.004; ††p=0.003 vs. Control, Control+Caf10, Control+Caf20, Col+Caf10]                                                                                                                                                                                             |
| Number of entrances in quadrant 2 in the retention 2 of the MWM |                                                                                                     | [F <sub>(2,65)</sub> =4.60, p=0.013; ‡p=0.047 vs. Control+Caf10 and Control+Caf20]                                                                                                                                                                                                               |
| Brain/body weight ratio                                         | [F <sub>(2,87)</sub> = 4.24, †p=0.017 vs. Control, Control+Caf10 and Control+Caf20]                 | [F <sub>(2,93)</sub> = 8.38, **p<0.01 vs. rest of the groups]                                                                                                                                                                                                                                    |
| Cortex size                                                     | F <sub>(5,236)</sub> =3.30, p=0.038, **p<0.001 vs. rest of the groups, ††p<0.001 vs. Control+caf10] | [F <sub>(2,187)</sub> =3.32, p=0.038, #p=0.007 vs. Control+Caf20, Col+Caf10 and Col+Caf20]                                                                                                                                                                                                       |
| Hippocampus size                                                | [F <sub>(2,117)</sub> =0.117, p=0.890]                                                              | [F <sub>(2,83)</sub> =0.779, p=0.453]                                                                                                                                                                                                                                                            |
| Ventricle size                                                  | [F <sub>(2,107)</sub> =0.198, p=0.5]                                                                | [F <sub>(2,163)</sub> =3.12, p=0.046; ††p=0.005 vs. Control, Control+Caf10,                                                                                                                                                                                                                      |

Supplementary Material

|                                    |                                                                                                                                | Control+Caf20, Col+Caf20]                                                                               |
|------------------------------------|--------------------------------------------------------------------------------------------------------------------------------|---------------------------------------------------------------------------------------------------------|
| Cortex NeuN/DAPI ratio             | [F <sub>(2,271)</sub> =9.53, p<0.001; **p<0.01 vs. rest of the groups]                                                         | [F <sub>(2,2983)</sub> =4.45, p=0.012; **p<0.01 vs. rest of the groups]                                 |
| SVZ NeuN/DAPI ratio                | P14 [F <sub>(2,420)</sub> =11.82, p<0.01; **p<0.01 vs. rest of the groups]                                                     | [F <sub>(2,559)</sub> =0.351, p=0.704]                                                                  |
| Cortex neurite curvature ratio     | [F <sub>(2,4048)</sub> =16.79, p<0.01; **p<0.01 vs. rest of the groups, ††p<0.01 vs. Control, Control+Caf10 and Control+Caf20] | [F <sub>(2,3645)</sub> =2.65, p=0.071]                                                                  |
| SVZ neurite curvature ratio        | F <sub>(2,1129)</sub> =7.27, p=0.001; **p<0.01 vs. rest of the groups]                                                         | [F <sub>(2,1016)</sub> =0.269, p=0.765]                                                                 |
| Cortex P-tau/ total tau ratio      | [F <sub>(2,30)</sub> =3.33, p=0.49; ††p=0.006 vs. Control and Control+Caf10]                                                   | [F <sub>(2,26)</sub> =0.016, p=0.984]                                                                   |
| Striatum P-tau/total tau ratio     | [F <sub>(2,27)</sub> =0.031, p=0.970]                                                                                          | [F <sub>(2,25)</sub> =0.768, p=0.474]                                                                   |
| Density of Ki67 <sup>+</sup> cells | [F <sub>(2,94)</sub> =1.74 p=0.181]                                                                                            | [F <sub>(2,85)</sub> =0.023, p=0.977]                                                                   |
| DCX burden                         | [F <sub>(2,95)</sub> =5.86, p=0.003; ##p=0.004 vs. Control and Col+Caf20]                                                      | [F <sub>(2,83)</sub> =0.694, p=0.503]                                                                   |
| DCX/ Ki67 <sup>+</sup> ratio       | [F <sub>(2,96)</sub> =0.00, p=1.00]                                                                                            | [F <sub>(2,84)</sub> =0.00, p=1.00]                                                                     |
| Cortex hemorrhage burden           | [F <sub>(2,150)</sub> =4.27, p=.016; ††† p=0.001 vs. Control, Control+Caf20 and Col+Caf20]                                     | [F <sub>(2,153)</sub> =12.02, p<0.001, **p=0.001 vs. rest of the groups]                                |
| SVZ hemorrhage burden              | [F <sub>(2,73)</sub> =5.93, p=0.004, **p=0.003 vs. rest of the groups]                                                         | [F <sub>(2,71)</sub> =4.74, p=0.012, ††p=0.010 vs. Control, Control+Caf10, Control+Caf20 and Col+Caf20] |
| Cortex microglia burden            | [F <sub>(2,1814)</sub> =87.42, p<0.001, **p<0.01 vs. rest of the groups, †††p<0.01 vs. Control+Caf20]                          | [F <sub>(2,2914)</sub> =6.22, p=0.002; ††p<0.01 vs. Control, Control+Caf10, Col+Caf10 and Col+Caf20]    |
| SVZ microglia burden               | F <sub>(2,335)</sub> =12.11, p<0.001; **p<0.01 vs. rest of the groups, †††p<0.01 vs. Control+Caf20]                            | [F <sub>(2,547)</sub> =7.14, p=0.001; **p<0.01 vs. rest of the groups]                                  |

**Supplementary Table 2.** Hemorrhage burden are limited by Caf treatment in the cortex and SVZ both in the short (P14) and the Long (P70) term.

**Supplementary Table 2.** Hemorrhage burden was ameliorated by Caf treatment in the cortex and the hippocampus in animals with GM-IVH.

|               | Hemorrhage burden (% area affected) |               |               |                              |
|---------------|-------------------------------------|---------------|---------------|------------------------------|
|               | Cortex                              |               | SVZ           |                              |
| Group         | P14                                 | P70           | P14           | P70                          |
| Control       | 0.057±0.006                         | 0.022±0.003   | 0.138±0.035   | 0.446±0.130                  |
| Control+Caf10 | 0.066±0.006                         | 0.036±0.003   | 0.279±0.050   | 0.451±0.231                  |
| Control+Caf20 | 0.054±0.005                         | 0.046±0.006   | 0.252±0.049   | 0.506±0.363                  |
| Col           | 0.084±0.007 $\overline{\text{TT}}$  | 0.173±0.035** | 0.841±0.307** | 1.634±0.362 $\dagger\dagger$ |
| Col+Caf10     | 0.047±0.006                         | 0.070±0.009   | 0.359±0.067   | 0.959±0.316                  |
| Col+Caf20     | 0.061±0.03                          | 0.055±0.009   | 0.162±0.054   | 0.524±0.120                  |

Hemorrhage burden was increased in the cortex from animals with Col lesions. Caf treatment limited this situation in the short [ $F_{(2,150)}=4.27$ ,  $p=.016$ ;  $\overline{\text{TT}}p=0.001$  vs. Control, Control+Caf20 and Col+Caf20]. In the long term, Caf treatment completely counterbalanced increased cortical hemorrhage burden [ $F_{(2,153)}=12.02$ ,  $p<0.001$ ,  $**p=0.001$  vs. rest of the groups]). Hemorrhage burden was also improved in the SVZ after Caf treatment at P14 [ $F_{(2,73)}=5.93$ ,  $p=0.004$ ,  $**p=0.003$  vs. rest of the groups]. By P70 Caf at the highest dose (20 mg/Kg/day) successfully reduced hemorrhage burden in the SVZ [ $F_{(2,71)}=4.74$ ,  $p=0.012$ ,  $\dagger\dagger p=0.010$  vs. Control, Control+Caf10, Control+Caf20 and Col+Caf20].
